# Supplementary material
Source: Springer Nature journal article supplement (https://www.springermedizin.de/resource/supplementary/12881_2005_104_MOESM3_ESM.pdf/9452426)

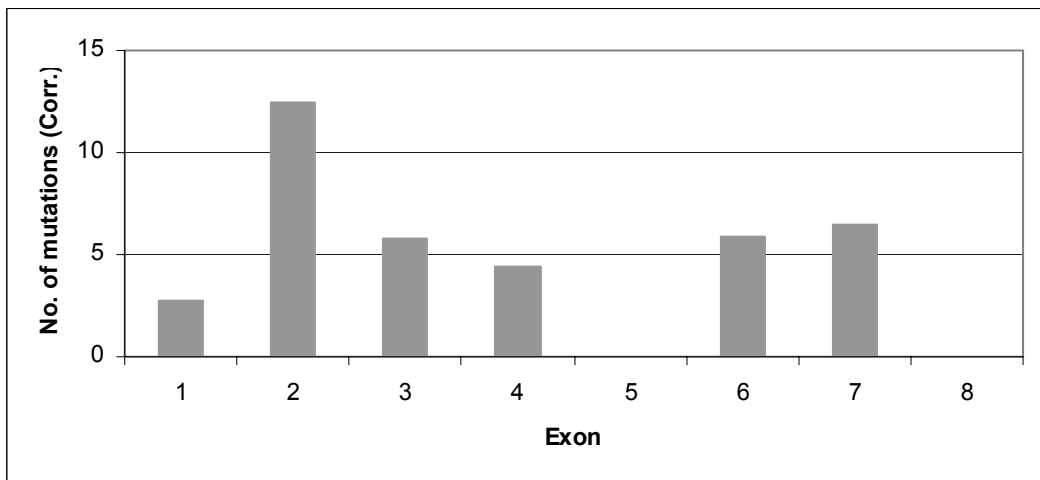

A)

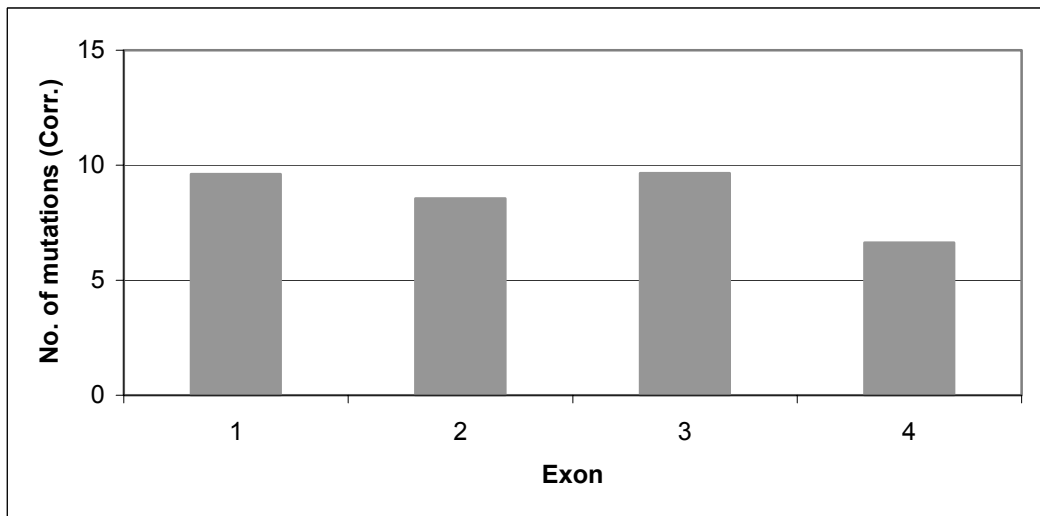

B)

Supplement: MOESM3 [file 9452426]
